# Supplementary material for: Bioengineering a glucose oxidase nanosensor for near-infrared continuous glucose monitoring
Source: Royal Society of Chemistry journal article supplement (doi:10.1039/d2na00092j), 2022-01-01
Supplement: d2na00092j1.pdf [file d2na00092j1.pdf]

## Supplementary Information

### Bioengineering a glucose oxidase nanosensor for near-infrared continuous glucose monitoring

Vitalijs Zubkovs<sup>\*a,b</sup>, Hanxuan Wang<sup>a</sup>, Nils Schuergers<sup>a,c</sup>, Astrid Weninger<sup>d</sup>, Anton Glieder<sup>d,e</sup>, Stefano Cattaneo<sup>b</sup>, and Ardemis A. Boghossian<sup>\*a</sup>

<sup>a</sup> École Polytechnique Fédérale de Lausanne, Lausanne, Switzerland, E-mail: ardemis.boghossian@epfl.ch

<sup>b</sup> Swiss Center for Electronics and Microtechnology (CSEM), Landquart, Switzerland, E-mail: vitalijs.zubkovs@csem.ch

<sup>c</sup> Institute of Biology III, University of Freiburg, Freiburg, Germany

<sup>d</sup> Institute of Molecular Biotechnology, Graz University of Technology, Graz, Austria

<sup>e</sup> bisy GmbH, Hafstaetten, Austria

**Table S1:** *A. niger* wild type GOx genes from GenBank. The signalling sequence is indicated in bold and was replaced by a deletion variant of the *S. cerevisiae* mating factor alpha signal sequence for expression by *K. phaffii*.

>gi|2357|emb|CAA34197.1| Glucose oxidase protein form *Aspergillus niger*

**MQTLLVSSLVVS**LAAALPHYIRSNGIEASLLTDPKDVSGRTVDYIIAGGGLTGLTTAARLTENPNISVLVIESGSY  
ESDRGPIIEDLNAYGDIFGSSVDHAYETVELATNNQTALIRSGNGLGGSTLVNNGGTWTRPHKAQVDSWETVFG  
NEGWNWDNVAAYSLSQAERARAPNAKQIAAGHYFNASCHGVNGTVHAGPRDTGDDYSPIVKALMSAVEDRG  
VPTKKDFGCGDPHGVSMPNTLHEDQVRSDAAREWLLPNYQRPNLQVLTGQYVGKVLSSQNGTTPRAVGVE  
FGTHKGNTHNVYAKHEVLLAAGSAVSPTILEYSIGIMKSILEPLGIDTVVDLPVGLNLDQQTATVRSRITSAGA  
GQGQAAWFATFNETFGDYSEKAHELLNTKLEQWAEAAVARGGFHNTTALLIQYENYRDWIVNHNVAISELFL  
DTAGVASFDVWDLFPFTRGYVHILDKDPYLHHFAYDPQYFLNELDLLGQAAATQLARNISNSGAMQTYFAGET  
IPGDNLAYDADLSAWTEYIPYHFRPNYHGVTCSMMPKEMGGVVDNAARVYGVQGLRVIDGSIPPTQMSSHV  
MTVIFYAMALKISDAILEDYASMQ

**Table S2:** Synthetic double stranded DNA primers used for preparation of mutated GOx expression plasmids

| Primer  | Primer sequence (5' to 3')              | Size (bp) |
|---------|-----------------------------------------|-----------|
| K13C-F  | GGA CTG ACC CTT GTG ACG TCT CAG GTC     | 27        |
| K13C-R  | GAC CTG AGA CGT CAC AAG GGT CAG TCC     | 27        |
| D70C-F  | GAA TGC TTA TGG TTG TAT CTT CGG ATC TTC | 30        |
| D70C-R  | GAA GAT CCG AAG ATA CAA CCA TAA GCA TTC | 30        |
| A418C-F | GAC CTG AGA CGT CAC AAG GGT CAG TCC     | 27        |
| A418C-R | GTT CCT TGA CAC TTG TGG TGT CGC TTC     | 27        |
| H446C-F | GGA CCC ATA CCT TTG TCA CTT CGC TTA CG  | 29        |
| H446C-R | CGT AAG CGA AGT GAC AAA GGT ATG GGT CC  | 29        |

**Table S3:** Cell culture media used for *E. coli* and *P. pastoris* culturing

| Medium                     | Preparation protocols                                                                                                                                                                                                                                                                                                                                                                                                                                                                                                           |
|----------------------------|---------------------------------------------------------------------------------------------------------------------------------------------------------------------------------------------------------------------------------------------------------------------------------------------------------------------------------------------------------------------------------------------------------------------------------------------------------------------------------------------------------------------------------|
| LB growth medium           | 10 g of tryptone (Sigma), 5 g of yeast extract (Becton Dickinson and Company), and 10 g of NaCl (Sigma) dissolved in dH <sub>2</sub> O in a 1 L bottle. Next, adjusted pH to 7.0 and sterilize in an autoclave.                                                                                                                                                                                                                                                                                                                 |
| LB growth medium and agar  | Agar added to the LB growth medium at concentration 15 g L <sup>-1</sup> .                                                                                                                                                                                                                                                                                                                                                                                                                                                      |
| YPD growth medium          | 10 g of yeast extract, 20 g of peptone (Becton Dickinson and Company) were dissolved in 900 mL dH <sub>2</sub> O and autoclaved. 100 mL of sterile 220 g L <sup>-1</sup> dextrose (Sigma) were added to the solution.                                                                                                                                                                                                                                                                                                           |
| YPD growth medium and agar | 15 g L <sup>-1</sup> of agar were dissolved in the YPD growth medium.                                                                                                                                                                                                                                                                                                                                                                                                                                                           |
| BMD 1% growth medium       | In a 1 L bottle was mixed sterile solutions of 50 mL of 220 g L <sup>-1</sup> dextrose (Sigma), 200 mL of 1M K <sub>2</sub> PO <sub>4</sub> buffer at pH 6, 100 mL of 134 g L <sup>-1</sup> of yeast nitrogen base w/o amino acids (Becton Dickinson and Company), and 2 mL of 200 µg mL <sup>-1</sup> Biotin (Fluka Chemia AG) filtered through a sterile 0.2 µm porous filter. The bottle filled with sterile dH <sub>2</sub> O up to the 1 L mark. Zeocin (InvivoGen-Eubio) added at concentration 100 µg mL <sup>-1</sup> . |
| BMM2 (1% methanol) medium  | In a 1 L bottle was mixed 10 mL of methanol (Carl Roth GmbH), 200 mL of 1M K <sub>2</sub> PO <sub>4</sub> buffer at pH 6, 100 mL of 134 g L <sup>-1</sup> of yeast nitrogen base yeast nitrogen base w/o amino acids, 2 mL of 200 µg mL <sup>-1</sup> Biotin filtered through a sterile 0.2 µm porous filter. The bottle filled with sterile dH <sub>2</sub> O up to the 1 L mark. Zeocin added at concentration 100 µg mL <sup>-1</sup> .                                                                                      |
| BMM10 (5% methanol) medium | In a 1 L bottle was mixed 50 mL of methanol, 200 mL of 1M K <sub>2</sub> PO <sub>4</sub> buffer at pH 6, 200 mL of 134 g L <sup>-1</sup> of yeast nitrogen base yeast nitrogen base w/o amino acids, 2 mL of 200 µg mL <sup>-1</sup> Biotin filtered through a sterile 0.2 µm porous filter. The bottle filled with sterile dH <sub>2</sub> O up to the 1 L mark. Zeocin added at concentration 100 µg mL <sup>-1</sup> .                                                                                                       |

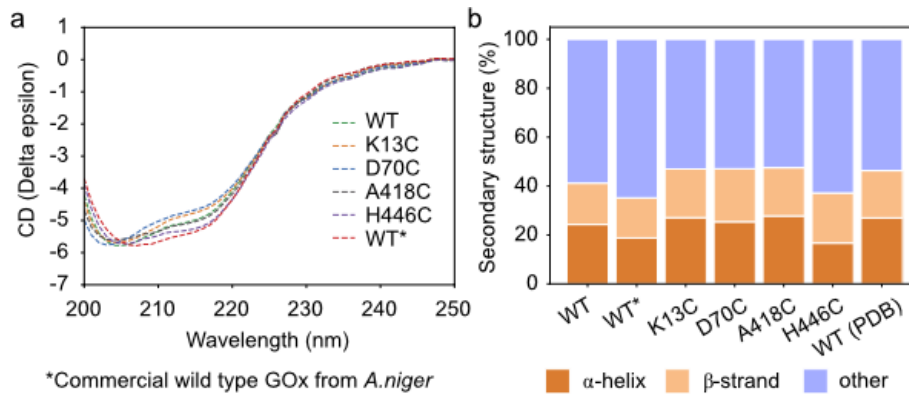

**Fig. S1:** (a) Fitted CD spectra of GOx variants using a secondary structure prediction software BeStSel. (b) Distribution of BeStSel-predicted percentage of structure features ( $\alpha$ -helices and  $\beta$ -strands) in the GOx variants. The variants are compared to the crystal structure from the PDB 1CF3 code. A star symbol indicates the sample which was made of commercial GOx obtained from *A. niger*.

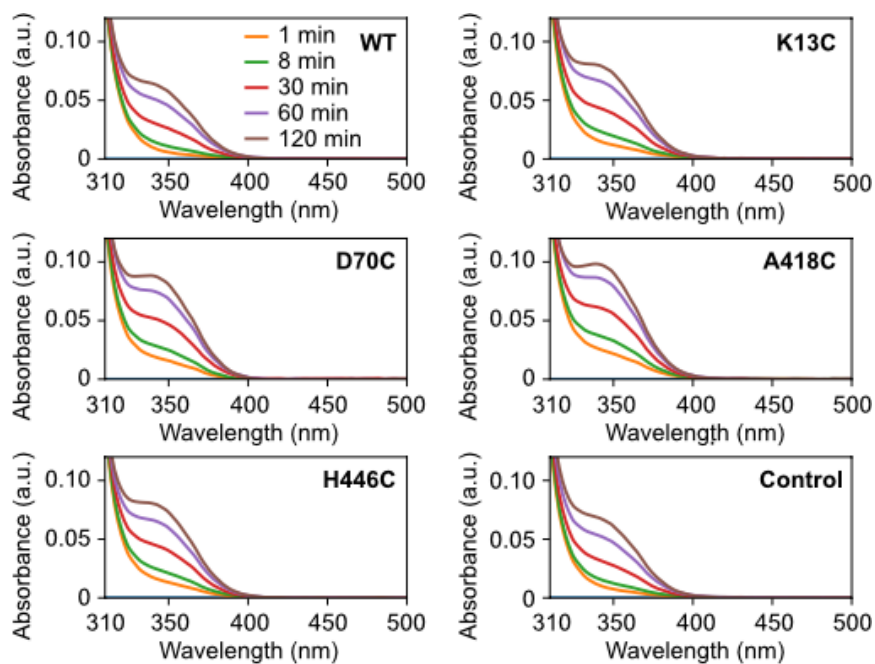

**Fig. S2:** UV-Vis absorption spectra after addition of SPDP to the GOx solutions measured at 1, 8, 30, 60, and 120 minutes time points. Spontaneous degradation of SPDP was measured in PBS (control). The absorbance spectra measured before addition of SPDP were subtracted for each measurement.

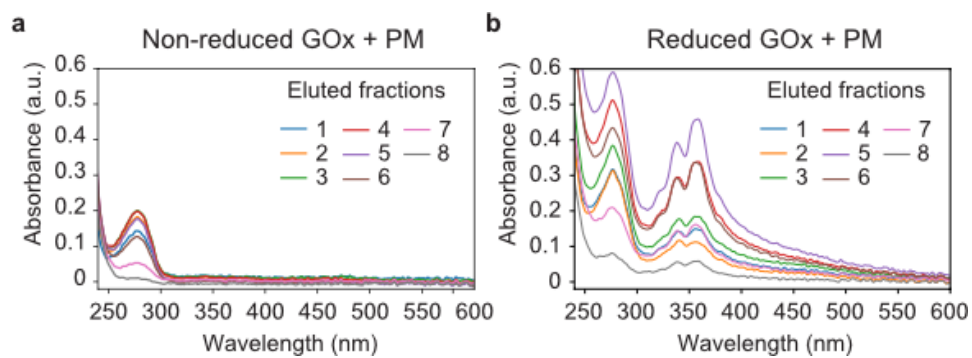

**Fig. S3:** Absorbance of the elution fractions (150  $\mu$ l each fraction) collected from a desalting column after conjugation of non-reduced (a) and reduced (b) GOx to the PM crosslinker.

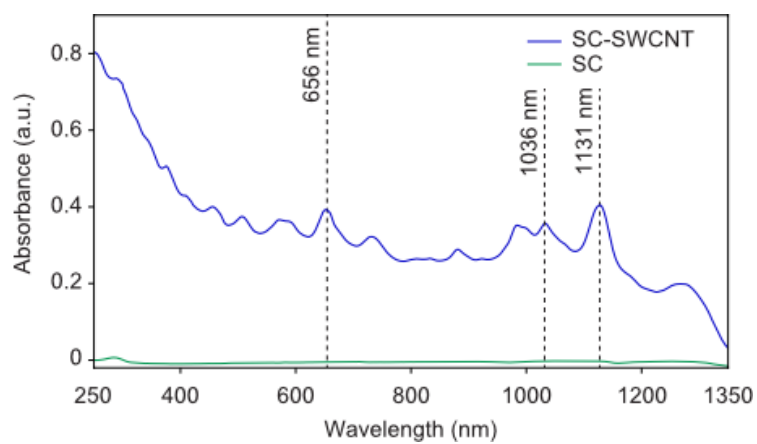

**Fig. S4:** Absorbance spectra of SC-SWCNTs (1% SC) and 1% SC.

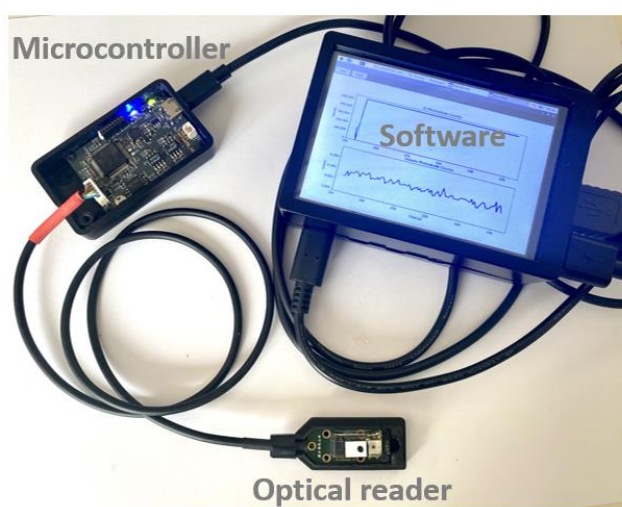

**Fig. S5:** Photo of the miniaturized device for continuous glucose monitoring.
